1 **Potent antibody immunity to SARS-CoV-2 variants elicited by a third**  
2 **dose of inactivated vaccine**

3

4 Bin Ju<sup>1,3,\*,#</sup>, Bing Zhou<sup>1,\*</sup>, Shuo Song<sup>1,\*</sup>, Qing Fan<sup>1</sup>, Xiangyang Ge<sup>1</sup>, Haiyan  
5 Wang<sup>1</sup>, Lin Cheng<sup>1</sup>, Huimin Guo<sup>1</sup>, Dan Shu<sup>1</sup>, Lei Liu<sup>4,#</sup>, Zheng Zhang<sup>1,2,3,#</sup>

6

7 <sup>1</sup>Institute for Hepatology, National Clinical Research Center for Infectious  
8 Disease, Shenzhen Third People's Hospital; The Second Affiliated Hospital,  
9 School of Medicine, Southern University of Science and Technology, Shenzhen  
10 518112, Guangdong Province, China

11 <sup>2</sup>Shenzhen Research Center for Communicable Disease Diagnosis and  
12 Treatment of Chinese Academy of Medical Science, Shenzhen 518112,  
13 Guangdong Province, China

14 <sup>3</sup>Guangdong Key laboratory for anti-infection Drug Quality Evaluation,  
15 Shenzhen 518112, Guangdong Province, China

16 <sup>4</sup>Department for Infectious Diseases, National Clinical Research Center for  
17 Infectious Disease, Shenzhen Third People's Hospital; The Second Affiliated  
18 Hospital, School of Medicine, Southern University of Science and Technology,  
19 Shenzhen 518112, Guangdong Province, China

20

21 \*These authors contributed equally to this work.

22 #Correspondence:

23 zhangzheng1975@aliyun.com (Z.Z.)

24 liulei3322@aliyun.com (L.L.)

25 jubin2013@163.com (B.J.)

26 **Summary**

27 SARS-CoV-2 variants are still prevalent worldwide and continue to pose a  
28 challenge to the effectiveness of current vaccines. It remains unknown whether  
29 a third dose of inactivated vaccine elicits immune potential against SARS-CoV-  
30 2 variants. Here, we showed a significant decline in plasma neutralization  
31 against SARS-CoV-2 at seven months after a second dose of the inactivated  
32 vaccine in a large-scale cohort. However, we also found that a third vaccination  
33 with an inactivated vaccine largely increased plasma neutralization against  
34 variants including Beta, Delta, and Lambda. More importantly, the high-affinity  
35 anti-RBD memory B cells were also generated by the third vaccination,  
36 suggesting a more potent and longer protection. These findings highlighted the  
37 importance and effectiveness of a third dose of inactivated vaccine in conferring  
38 higher protection against the emerging variants in populations.

## 39 Introduction

40 The coronavirus disease 2019 (COVID-19) pandemic has already lasted for  
41 nearly two years and continues to threaten human health and life. By October  
42 26, 2021, severe acute respiratory syndrome coronavirus 2 (SARS-CoV-2) had  
43 infected more than 244 million individuals and caused over 4.9 million deaths  
44 around the world. While several effective vaccines have been deployed to  
45 combat wild-type (WT) virus infection<sup>1-3</sup>, the emerging SARS-CoV-2 variants  
46 showed enhanced transmissibility and significantly escaped the neutralization  
47 of vaccine-elicited plasma. New infections caused by SARS-CoV-2 variants are  
48 still rising sharply worldwide, especially the Alpha, Beta, Delta, and Lambda  
49 variants. They have contributed to several current waves of infection globally<sup>4-</sup>  
50 <sup>9</sup>.

51 More seriously, breakthrough infections of SARS-CoV-2 variants after  
52 vaccination have occurred widely with a significant reduction in vaccine efficacy  
53 over time<sup>10-12</sup>. Data from a recent study in New York City demonstrated that  
54 mutated strains, including Alpha and Iota, are able to escape the protection of  
55 several vaccines, including BNT162b2, mRNA-1273 and JNJ-78436735<sup>13</sup>. The  
56 remarkable drop in neutralizing activities of vaccine-elicited plasma has been  
57 considered to be a key factor leading to breakthrough infection.

58 Currently, many researchers have asked whether a third dose of vaccine is  
59 necessary to increase the titers of neutralizing antibodies (nAbs) against SARS-  
60 CoV-2 variants and to better control the current COVID-19 pandemic. A third  
61 dose of the mRNA vaccine BNT162b2 has been proven to be effective in  
62 combatting variants. It was reported that the neutralization geometric mean  
63 titers (GMTs) against Beta increased more than 15 to 20 times compared with  
64 those after the second vaccination, and the ratio (Delta to WT) of neutralization  
65 GMTs raised to 0.85 and 0.92 in younger adults and in older adults after a third  
66 dose of BNT162b2, respectively<sup>14</sup>.

67 The inactivated vaccine, as an important vaccine candidate, has shown good  
68 immunogenicity in clinical trials and has been widely used in the population<sup>15,16</sup>.  
69 However, it remains elusive whether plasma antibody titers against SARS-CoV-  
70 2 variants decline with time in inactivated vaccinees, especially in those who  
71 have received two doses of vaccines for more than half a year. In addition, the

72 antibody immunity to SARS-CoV-2 variants elicited by a third dose of  
73 inactivated vaccine has not been comprehensively analyzed in a large-scale  
74 cohort, which is critical to develop strategies for curbing the spread of SARS-  
75 CoV-2 variants.

76 In this study, we summarized a large cohort of more than 500 individuals who  
77 received two or three doses of inactivated SARS-CoV-2 vaccines (BBIBP-CorV)  
78 and were followed up for nearly nine months. We characterized the kinetics of  
79 plasma IgG and IgM bound to the viral receptor binding domain (RBD)  
80 throughout the follow-up period and defined the decline in neutralizing activities  
81 against SARS-CoV-2 Beta, Delta, and Lambda variants in inactivated  
82 vaccinees 7 months after the second vaccination. More importantly, we proved  
83 that a third dose of inactivated vaccine could significantly increase the titers of  
84 binding and neutralizing antibodies against SARS-CoV-2 variants and enhance  
85 the percentages and affinities of RBD-specific memory B cells (MBCs). These  
86 data provided a proof of concept that a third booster immunization with an  
87 inactivated vaccine could be considered an effective measure against the  
88 SARS-CoV-2 variant pandemic.

89

## 90 **Methods**

### 91 **Study approval and blood samples**

92 This study was approved by the Ethics Committee of Shenzhen Third  
93 People's Hospital, China (approval number: 2020-030). All participants had  
94 provided written informed consent for sample collection and subsequent  
95 analysis. All plasma and peripheral blood mononuclear cells (PBMCs) from  
96 individuals who received two or three doses of inactivated SARS-CoV-2  
97 vaccines (BBIBP-CorV, the Sinopharm COVID-19 vaccine, Beijing Institute of  
98 Biological Products Co., Ltd) were collected at different time points of follow-up  
99 from the Biobank of the Shenzhen Third People's Hospital. All plasma samples  
100 were stored at -80 °C and heat-inactivated at 56 °C for 1 h before use. PBMCs  
101 were maintained in freezing medium and stored in liquid nitrogen.

### 102 **Enzyme linked immunosorbent assay (ELISA)**

103 SARS-CoV-2 wild-type (WT) and mutated (Beta: K417N-E484K-N501Y,  
104 Delta: L452R-T478K, Lambda: L452Q-F490S) RBD proteins (Sino Biological)

105 were separately coated into 96-well plates at 4 °C overnight. The plates were  
106 washed with PBST buffer and blocked with 5% skim milk and 2% bovine  
107 albumin in PBS at room temperature (RT) for 1 h. Plasma samples were diluted  
108 at 1:20, added to the wells, and then incubated at 37 °C for 1 h. The plates were  
109 washed, and HRP-conjugated goat anti-human IgG antibodies (ZSGB-BIO)  
110 were added and then incubated at 37 °C for 30 mins. Finally, the TMB substrate  
111 (Sangon Biotech) was added to the wells and incubated at RT for 5 mins, and  
112 the reaction was stopped with 2 M H<sub>2</sub>SO<sub>4</sub>. The readout was detected at  
113 wavelengths of 450 nm and 630 nm. For titration of the end-point titers of  
114 binding antibodies, plasma samples were serially diluted 3-fold from 1:20 to  
115 1:43740 and then added to the plates. The following steps were the same as  
116 those mentioned above. A cutoff was set as an OD<sub>450nm-630nm</sub> value of 0.100.  
117 The end-point titer was defined as the last dilution whose OD<sub>450nm-630nm</sub> value  
118 was over 0.100.

#### 119 **SARS-CoV-2 pseudovirus-based neutralizing assay**

120 SARS-CoV-2 pseudovirus was generated by cotransfection of HEK-293T  
121 cells with SARS-CoV-2 spike-expressing plasmid and an env-deficient HIV-1  
122 backbone vector (pNL4-3.Luc.R-E-). Two days post transfection, the culture  
123 supernatant was harvested, clarified by centrifugation, filtered and stored at -  
124 80 °C. To determine the neutralizing activity, plasma samples were serially  
125 diluted and incubated with an equal volume of SARS-CoV-2 pseudovirus at  
126 37 °C for 1 h. HEK-293T-hACE2 cells were subsequently added to the plates.  
127 After a 48 h incubation, the culture medium was removed, and 100 µL of Bright-  
128 Lite Luciferase reagent (Vazyme Biotech) was added to the cells. After a 2 min  
129 incubation at RT, 90 µl of cell lysate was transferred to 96-well white solid plates  
130 for measurements of luminescence using the Varioskan™ LUX multimode  
131 microplate reader (Thermo Fisher Scientific). The 50% inhibitory dilution (ID<sub>50</sub>)  
132 was calculated using GraphPad Prism 8.0 software by log (inhibitor) vs.  
133 normalized response - Variable slope (four parameters) model.

#### 134 **Flow cytometric analysis of RBD-specific memory B cells**

135 Thawed PBMCs were stained with an antibody cocktail consisting of CD19-  
136 PE-Cy7, CD3-Pacific Blue, CD8-Pacific Blue, CD14-Pacific Blue, CD27-APC-  
137 H7, and IgG-FITC (all from BD Biosciences) to gate IgG<sup>+</sup> memory B cells.

138 SARS-CoV-2 WT RBD with His tag (Sino Biological) was used as a probe to  
139 target antigen-specific B cells. Two anti-His secondary antibodies separately  
140 labeled with APC and PE (Abcam) were both used to recognize the RBD bait  
141 and exclude nonspecific staining. A LIVE/DEAD Fixable Dead Cell Stain Kit  
142 (Invitrogen) was used to exclude dead cells. Flow cytometric data were  
143 acquired on an Aria II flow cytometer (BD Biosciences) and analyzed using  
144 FlowJo software (TreeStar).

#### 145 **Statistical analysis**

146 Statistical analysis was performed with paired or unpaired t tests using  
147 GraphPad Prism 8.0 software. \*,  $P < 0.05$ ; \*\*,  $P < 0.01$ ; \*\*\*,  $P < 0.001$ ; \*\*\*\*,  $P <$   
148  $0.0001$ .

149

#### 150 **Results**

##### 151 **Longitudinal dynamics of plasma IgG and IgM against SARS-CoV-2** 152 **during three doses of inactivated vaccines.**

153 Five hundred and thirty-three participants who received two or three doses  
154 of BBIBP-CorV containing 4  $\mu\text{g}$  total protein were enrolled in this study. These  
155 donors were followed up at Week 2 after first vaccination ( $n = 344$ ), Week 2  
156 after second vaccination ( $n = 533$ ), Month 2 after second vaccination ( $n = 286$ ),  
157 Month 7 after second vaccination (i.e., before third vaccination,  $n = 130$ ), and  
158 Week 2 after third vaccination ( $n = 176$ ). As shown in Figure 1A, a total of 1469  
159 blood samples were collected from 533 donors at the above five follow-up time  
160 points.

161 We measured the binding IgG and IgM activities to SARS-CoV-2 WT RBD in  
162 all plasma using a chemiluminescence immunoassay kit. IgG seroconversion  
163 was present in more than 98% (526/533) of vaccine recipients at Week 2 after  
164 second vaccination. The mean value of plasma IgG was significantly increased  
165 10.41-fold compared with that at Week 2 after first vaccination. However, anti-  
166 RBD IgG values were gradually decreased to 41.8% at Month 2 after second  
167 vaccination and additionally dropped to 42.9% at Month 7. Specially, the  
168 positive rate of RBD-specific IgG was decreased to approximately 75% in 130  
169 donors at Month 7 after second vaccination (Figure 1B).

170 Subsequently, we collected blood samples from a total of 176 individuals who

171 accepted a third dose of BBIBP-CorV. Nearly all vaccinees (175/176) were  
172 characterized by the seroconversion of IgG against SARS-CoV-2 at Week 2  
173 after third vaccination, and their mean IgG values were increased 8.00-fold  
174 compared with those before third vaccination and 1.44-fold compared with  
175 those after second vaccination (Figure 1B). RBD-specific IgM displayed a  
176 similar pattern of kinetics as IgG, although the mean values of IgM were  
177 absolutely lower than IgG at each time point (Figure 1C). However, the  
178 difference between IgM and IgG was that the third dose of vaccine did not  
179 induce a strong IgM response, suggesting that IgG may play a more important  
180 role in recalling to the SARS-CoV-2 vaccine or viral infection exposure.

181

182 **A third dose of inactivated vaccine elicits robust binding antibodies to**  
183 **SARS-CoV-2 independent on gender and age.**

184 To evaluate the effects of the third dose on humoral immune responses, we  
185 detected serially paired plasma samples before third vaccination (at Week 2  
186 and Month 7 after second vaccination) and Week 2 after third vaccination in  
187 113 donors. Seven months after second vaccination, RBD-specific IgG levels  
188 induced by two doses of vaccines were sharply decreased 82.1% compared  
189 with those at Week 2 after second vaccination. Importantly, the mean COI value  
190 of plasma anti-RBD IgG rapidly increased to 16.7 by a third vaccination, which  
191 was an 8.14-fold increase compared to that before third vaccination and was  
192 also significantly higher than that induced by two doses of vaccines (Figure 1D).  
193 In contrast, a third dose of inactivated vaccine failed to induce a recalling IgM  
194 response (Figure 1E).

195 We further compared the differences in anti-RBD IgG levels between male  
196 and female donors. There were 42 male donors (37%) and 71 female donors  
197 (63%) in the cohort. As shown in Figure 1F, both male and female donors  
198 displayed similar levels of RBD-specific IgG after third vaccination, although  
199 female donors had higher levels of anti-RBD IgG than males at Week 2 after  
200 second vaccination. There were no obvious relationships between anti-RBD  
201 IgG and ages at the three different follow-up time points (Figure 1G). These  
202 data showed that the third vaccination with an inactivated vaccine elicits robust  
203 binding antibodies to SARS-CoV-2 independent on gender and age.

204

205 **A third dose of inactivated vaccine elicits potent neutralizing antibodies**  
206 **against SARS-CoV-2 variants**

207 To evaluate the ability of a third dose of inactivated vaccine to fight against  
208 the infection of mutant viruses, we detected both binding antibodies to RBD  
209 proteins and neutralizing antibodies (nAbs) against pseudoviruses of SARS-  
210 CoV-2 WT, Beta, Delta, and Lambda variants. We established the ELISA and  
211 pseudovirus-based neutralizing assay to test the binding activity and  
212 neutralization. The results of 20 non-vaccinated healthy donor plasma samples  
213 and a positive antibody control showed low backgrounds and good specificities  
214 of the two assays (Figure S1).

215 Then, we applied these two assays to detect the binding and neutralizing  
216 activities of plasma from the 113 donors. As shown in Figure 2A, similar to the  
217 binding response to WT RBD, mutated RBD-specific IgG was sharply  
218 decreased 7 months after second vaccination but was significantly increased  
219 by the third vaccination. The plasma neutralizing activities against WT and  
220 mutant pseudoviruses elicited by the inactivated vaccine displayed the same  
221 patterns as their binding activities (Figure 2B).

222 At Week 2 after second vaccination, 95% (108/113) of plasma demonstrated  
223 effective neutralization against WT virus with more than 50% inhibition at a 1:20  
224 dilution. At this time point, they, to some extent, maintained neutralizing  
225 activities against some important SARS-CoV-2 variants (Beta, Delta, and  
226 Lambda). However, at Month 7 after second vaccination, nearly half of the  
227 plasma (49/113) lost their neutralizing activities (inhibition < 50%), and the  
228 inhibition was decreased to 53.6% against the WT strain in these 113 donors.  
229 Notably, the inhibitions of plasma against Beta, Delta and Lambda variants had  
230 decreased to 34.4%, 40.4%, and 44.8%, respectively, indicating their poor  
231 defenses against SARS-CoV-2 variants.

232 After the third vaccination, the plasma inhibitions against WT, Beta, Delta,  
233 and Lambda were significantly increased to 94.6%, 71.6%, 83.4%, and 89.0%  
234 within 2 weeks, respectively. The binding and neutralizing activities of plasma  
235 against these variants were strongly related to those against WT virus (Figure  
236 S2 and S3). In addition, there were significant correlations between plasma



237 inhibitions and their binding activities at various time points after vaccination  
238 (Figure 2C). These findings indicated that a third dose of inactivated vaccine  
239 elicited potent neutralizing antibodies against SARS-CoV-2 variants.

240

### 241 **A third dose of inactivated vaccine elicits high-affinity memory B cells**

242 Virus-specific MBCs play important roles in recalling to viral infection and  
243 partially contribute to the durability of antibody immunity. Therefore, we  
244 randomly selected 24 individuals and summarized their 72 PBMCs before third  
245 vaccination (at Week 2 and Month 7 after second vaccination) and Week 2 after  
246 third vaccination to detect SARS-CoV-2 RBD-specific MBCs (Figure S4). As  
247 shown in Figure 3A, although plasma anti-RBD IgG was gradually decreased  
248 over time, the percentage of RBD-specific MBCs maintained a similar level at  
249 Month 7 as that at Week 2 after second vaccination, suggesting that these  
250 vaccine recipients might still retain a certain protection against SARS-CoV-2  
251 infection. Notably, the percentage of RBD-specific MBCs rapidly increased after  
252 the third vaccination, which was significantly higher than that at Week 2 after  
253 second vaccination and before third vaccination (0.96% vs. 0.50% and 0.53%).  
254 The mean fluorescence intensity (MFI) of RBD-binding MBCs was also  
255 significantly enhanced by the third vaccination compared to that at Week 2 after  
256 second vaccination and before third vaccination (4799 vs. 2951 and 2680 in  
257 APC, 8894 vs. 4516 and 4352 in PE). These data indicated that the third  
258 vaccination not only increases the proportion of MBCs but also enhances the  
259 RBD affinity with MBCs.

260 More importantly, we found that the third dose of vaccine induced extremely  
261 high-affinity MBCs in some individuals, whose MFIs of APC and PE on RBD-  
262 binding MBCs were both more than 2-fold higher than before the third  
263 vaccination (Figure 3B and 3C). Seven individuals with more than 2-fold higher  
264 MFI were defined as the high-affinity group, while the other 17 individuals were  
265 defined as the moderate-affinity group (Figure 3D). We thus compared the  
266 binding and neutralizing activities of plasma between the high-affinity and  
267 moderate-affinity groups at Week 2 after third vaccination. The geometric mean  
268 end-point titers of the plasma binding antibodies were significantly higher in the  
269 high-affinity group than those in the moderate-affinity group against WT RBD

270 and the other mutated RBD proteins (Beta, Delta, and Lambda) (Figure 3E and  
271 S5). Similarly, the neutralizing activities of plasma were also significantly higher  
272 in the high-affinity group than those in the moderate-affinity group (Figure 3F  
273 and S6). Therefore, the third vaccination of inactivated vaccine indeed elicited  
274 more potent nAbs and high-affinity MBCs, suggesting a persistent antibody  
275 immunity to SARS-CoV-2 variants.

276

## 277 **Discussion**

278 A large number of nAbs recognizing the RBD of virus have been isolated and  
279 divided into four classes according to their competitions with cell receptor  
280 (ACE2) and accessibilities of binding epitopes on the RBD in 'up' or 'down'  
281 conformations<sup>17</sup>. These anti-RBD nAbs could totally destroy or partly disturb  
282 the RBD-ACE2 interaction and thus block virus entry effectively. However,  
283 SARS-CoV-2 variants, including emerging variants of concern (VOCs) and  
284 variants of interest (VOIs), carry various mutations in the region of spike,  
285 especially on the nAb-binding sites of RBD. These mutations located in or near  
286 recognizing epitopes may lead to a significant decline in the neutralization of  
287 nAbs<sup>5,6,18,19</sup>.

288 One of the early VOCs, Beta, was first reported in South Africa and had the  
289 greatest reduction in neutralization capacity thus far<sup>20</sup>. Delta was identified in  
290 India and rapidly spread to many other countries, which had been classified as  
291 another VOC with 60% more transmissibility than Alpha and led to the current  
292 wave of COVID-19 pandemic<sup>7</sup>. In addition, recent preprint papers reported that  
293 a new VOI-Lambda with various deletions and substitutions in spike exhibited  
294 high infectivity and antibody resistance<sup>9,21</sup>.

295 Current vaccines are derived from the original Wuhan-Hu-1 gene, many nAbs  
296 elicited by which have been escaped due to the viral mutation. The K417N and  
297 E484K substitutions in Beta severely disrupted the binding of Class 1 and Class  
298 2 nAbs to the RBD<sup>5,22</sup>. The L452R/Q mutant led to Delta and Lambda escaping  
299 from the neutralization of nAbs from Class 3<sup>7,9,21</sup>. Encouragingly, some nAbs,  
300 such as Class 4, still neutralize the above variants effectively<sup>23-25</sup>, explaining  
301 why the plasma of vaccine recipients and convalescent individuals maintained  
302 on some extent neutralizing activities. These residual broad nAbs play

303 important roles in fighting against SARS-CoV-2 variants, leading to develop  
304 several strategies to increase their antibody titers. Booster immunization with  
305 the original vaccine is usually regarded as a direct and effective way to rapidly  
306 enhance the antibody titer and defend against the variants. Several evidences  
307 have demonstrated that vaccine recipients boosted with another dose of viral  
308 vector-based vaccine or mRNA vaccine rapidly produced sufficient nAbs  
309 against variants including Alpha, Beta, Gamma, and Delta<sup>14,26</sup>.

310 It remains unknown whether a third vaccination with an inactivated vaccine  
311 induces protective antibody responses against SARS-CoV-2 variants. We  
312 therefore evaluated the kinetics of plasma nAbs against variants and RBD-  
313 specific MBCs in a large-scale cohort who received two or three doses of  
314 inactivated vaccines. Although plasma neutralizing activity was generally  
315 reduced at 7 months after second vaccination, the antibody memory responses  
316 were well established by two doses of inactivated vaccines. The third dose of  
317 inactivated vaccine rapidly and significantly increased plasma antibody titers  
318 against various variants and generated high-affinity MBCs binding to RBD  
319 within two weeks. These findings suggest that a booster dose of inactivated  
320 vaccine increases the magnitude and breadth of neutralization in the pre-  
321 existing antibody response.

322 It is notable the differential dynamic of plasma neutralization and memory B  
323 cell responses by vaccination. Plasma neutralization peaks at two weeks post  
324 second vaccination and drops largely at seven months post second vaccination,  
325 then rebounds after the third vaccination. In contrast, MBCs are maintained at  
326 stable levels until seven months after second vaccination and are then  
327 significantly increased by a third vaccination. The mechanisms underlying the  
328 differential kinetics of plasma neutralization and memory B cell responses  
329 induced by vaccination are unclear. One possibility is that plasma neutralization,  
330 to a greater extent, reflects the functionality of the long-lived plasma cells in the  
331 bone marrow<sup>27</sup>. The MBC response is another important type of immune  
332 protection, whose quantity and quality contribute to the speed and potency of  
333 the immune system responding to viral reinfection<sup>28</sup>. Both factors collectively  
334 provide vaccine recipients with antibody protection against viral infection or  
335 prevent them from developing severe disease. Therefore, long-term monitoring

336 of plasma neutralization against SARS-CoV-2 variants and RBD-specific MBCs  
337 is valuable for evaluating the vaccine effectiveness. Long-term follow-up will  
338 evaluate the duration of the antibody response elicited by the third dose of  
339 inactivated vaccine in future studies.

340 Overall, our data highlighted the challenges for vaccine recipients who have  
341 received complete immunization more than 6 months. They are at risk of  
342 breakthrough infection by SARS-CoV-2 variants, as plasma neutralization is  
343 generally reduced at half a year after the second vaccination. Meanwhile, viral  
344 evolution will continue and new variants will emerge one after another. Based  
345 on a large-scale cohort with a long follow-up time, we emphasize the  
346 importance of a third dose of SARS-CoV-2 inactivated vaccine to confer higher  
347 protection against emerging variants.

348

#### 349 **Figure legends**

#### 350 **Figure 1. Longitudinal dynamics of humoral antibodies and boosting** 351 **effect of a third dose of inactivated vaccine against SARS-CoV-2.**

352 **(A)** Immunization schedule and blood specimen collection of 533 donors who  
353 received two or three doses of inactivated vaccines in this project. The interval  
354 time is shown as the mean  $\pm$  SD days. **(B-C)** Plasma antibody dynamics of anti-  
355 RBD IgG **(B)** and IgM **(C)** during three doses of vaccines. **(D-E)** The binding  
356 ability of IgG **(D)** and IgM **(E)** to RBD from 113 donors who completed three  
357 time-point follow-up visits: Week 2 and Month 7 after second vaccination and  
358 Week 2 after third vaccination. **(F)** Comparison of anti-RBD IgG values between  
359 male (n = 42) and female (n = 71) vaccinees. **(G)** Correlation analysis between  
360 anti-RBD IgG values and ages in the 113 donors at three follow-up visits.

361

#### 362 **Figure 2. Potent binding and neutralizing antibodies against SARS-CoV-2** 363 **variants induced by a third dose of inactivated vaccine.**

364 **(A)** ELISA binding of 113 donors at three follow-up visits to SARS-CoV-2 WT  
365 and mutated RBD proteins. **(B)** Neutralizing activities of 113 donors at three  
366 follow-up visits against SARS-CoV-2 WT, Beta, Delta, and Lambda variants.  
367 The inhibition of 50% is indicated by a horizontal dashed line. **(C)** Correlation  
368 analysis between binding and neutralizing activities against SARS-CoV-2 WT

369 and variants of 113 donors at three follow-up visits.

370

371 **Figure 3. High-affinity RBD-specific memory B cells elicited by a third**  
372 **dose of inactivated vaccine.**

373 **(A)** The percentage (left), MFI of APC (middle), and MFI of PE (right) of RBD-  
374 specific MBCs (CD19<sup>+</sup>CD3<sup>-</sup>CD8<sup>-</sup>CD14<sup>-</sup>CD27<sup>+</sup>IgG<sup>+</sup>SARS-CoV-2-RBD<sup>+</sup> cells) of  
375 randomly selected 24 donors with three follow-up visits. **(B)** The fold change of  
376 MFI in both APC and PE of RBD-specific MBCs between Week 2 after third  
377 vaccination and before third vaccination. A cutoff of 2-fold is indicated by the  
378 horizontal dashed line. High-affinity group: fold change > 2, moderate-affinity  
379 group: fold change < 2. **(C)** The typical display of high-affinity and moderate-  
380 affinity RBD-specific MBCs of 2 donors with three follow-up visits (high: BBIBP-  
381 donor 68, moderate: BBIBP-donor 113). **(D)** Comparison of MFI in both APC  
382 (left) and PE (right) of RBD-specific MBCs at Week 2 after third vaccination  
383 between the high-affinity group (n = 7) and the moderate-affinity group (n = 17).  
384 **(E)** The end-point titers of binding IgG to SARS-CoV-2 WT, Beta, Delta, and  
385 Lambda RBD proteins at Week 2 after third vaccination in the high-affinity and  
386 moderate-affinity groups. **(F)** The geometric mean titers of nAbs against SARS-  
387 CoV-2 WT, Beta, Delta, and Lambda pseudoviruses at Week 2 after third  
388 vaccination in the high-affinity and moderate-affinity groups. A cutoff of 1:20  
389 dilution is indicated by a horizontal dashed line.

390

### 391 **Acknowledgments**

392 We thank all participants who received inactivated vaccine and all of the healthy  
393 providers from Shenzhen Third People's Hospital for the work they have done.  
394 This study was supported by the National Science Fund for Distinguished  
395 Young Scholars (82025022), the National Natural Science Foundation of China  
396 (82002140, 82171752, 82101861), the Guangdong Basic and Applied Basic  
397 Research Foundation (2021B1515020034, 2019A1515011197,  
398 2021A1515011009, 2020A1515110656), and the Shenzhen Science and  
399 Technology Program (RCYX20200714114700046, JSGG20200207155251653,  
400 JSGG20200807171401008, KQTD20200909113758004,  
401 JCYJ20190809115617365).

402

### 403 **Author contributions**

404 Z.Z. is the principal investigator of this study. Z.Z., B.J., and L.L. conceived and  
405 designed the study. B.J., B.Z., S.S., Q.F., and X.G. performed all experiments  
406 together with assistance from H.W., L.C., H.G., and D.S.. Z.Z. and B.J. wrote  
407 the manuscript and all authors read and approved this version of manuscript.

408

### 409 **Data availability statements**

410 We are happy to share reagents and information in this study upon request.

411

### 412 **Conflict of interests**

413 The authors have no conflict of interest.

414

### 415 **References**

- 416 1 Koff, W. C. *et al.* Development and deployment of COVID-19 vaccines for  
417 those most vulnerable. *Sci Transl Med* **13**,  
418 doi:10.1126/scitranslmed.abd1525 (2021).
- 419 2 Dai, L. & Gao, G. F. Viral targets for vaccines against COVID-19. *Nat Rev*  
420 *Immunol* **21**, 73-82, doi:10.1038/s41577-020-00480-0 (2021).
- 421 3 Subbarao, K. The success of SARS-CoV-2 vaccines and challenges ahead.  
422 *Cell Host Microbe* **29**, 1111-1123, doi:10.1016/j.chom.2021.06.016 (2021).
- 423 4 Muik, A. *et al.* Neutralization of SARS-CoV-2 lineage B.1.1.7 pseudovirus  
424 by BNT162b2 vaccine-elicited human sera. *Science*,  
425 doi:10.1126/science.abg6105 (2021).
- 426 5 Wang, R. *et al.* Analysis of SARS-CoV-2 variant mutations reveals  
427 neutralization escape mechanisms and the ability to use ACE2 receptors  
428 from additional species. *Immunity*, doi:10.1016/j.immuni.2021.06.003  
429 (2021).
- 430 6 Dejnirattisai, W. *et al.* Antibody evasion by the P.1 strain of SARS-CoV-2.  
431 *Cell* **184**, 2939-2954 e2939, doi:10.1016/j.cell.2021.03.055 (2021).
- 432 7 Planas, D. *et al.* Reduced sensitivity of SARS-CoV-2 variant Delta to  
433 antibody neutralization. *Nature*, doi:10.1038/s41586-021-03777-9 (2021).
- 434 8 Liu, C. *et al.* Reduced neutralization of SARS-CoV-2 B.1.617 by vaccine and

- 435 convalescent serum. *Cell*, doi:10.1016/j.cell.2021.06.020 (2021).
- 436 9 Kimura, I. *et al.* SARS-CoV-2 Lambda variant exhibits higher infectivity and  
437 immune resistance. *bioRxiv*, doi:10.1101/2021.07.28.454085 (2021).
- 438 10 Kustin, T. *et al.* Evidence for increased breakthrough rates of SARS-CoV-2  
439 variants of concern in BNT162b2-mRNA-vaccinated individuals. *Nat Med*  
440 **27**, 1379-1384, doi:10.1038/s41591-021-01413-7 (2021).
- 441 11 Pollett, S. D. *et al.* The SARS-CoV-2 mRNA vaccine breakthrough infection  
442 phenotype includes significant symptoms, live virus shedding, and viral  
443 genetic diversity. *Clin Infect Dis*, doi:10.1093/cid/ciab543 (2021).
- 444 12 Hacısuleyman, E. *et al.* Vaccine Breakthrough Infections with SARS-CoV-2  
445 Variants. *N Engl J Med* **384**, 2212-2218, doi:10.1056/NEJMoa2105000  
446 (2021).
- 447 13 Duerr, R. *et al.* Dominance of Alpha and Iota variants in SARS-CoV-2  
448 vaccine breakthrough infections in New York City. *J Clin Invest* **131**,  
449 doi:10.1172/JCI152702 (2021).
- 450 14 Falsey, A. R. *et al.* SARS-CoV-2 Neutralization with BNT162b2 Vaccine  
451 Dose 3. *N Engl J Med*, doi:10.1056/NEJMc2113468 (2021).
- 452 15 Xia, S. *et al.* Effect of an Inactivated Vaccine Against SARS-CoV-2 on Safety  
453 and Immunogenicity Outcomes: Interim Analysis of 2 Randomized Clinical  
454 Trials. *JAMA* **324**, 951-960, doi:10.1001/jama.2020.15543 (2020).
- 455 16 Xia, S. *et al.* Safety and immunogenicity of an inactivated SARS-CoV-2  
456 vaccine, BBIBP-CorV: a randomised, double-blind, placebo-controlled,  
457 phase 1/2 trial. *Lancet Infect Dis* **21**, 39-51, doi:10.1016/S1473-  
458 3099(20)30831-8 (2021).
- 459 17 Barnes, C. O. *et al.* SARS-CoV-2 neutralizing antibody structures inform  
460 therapeutic strategies. *Nature*, doi:10.1038/s41586-020-2852-1 (2020).
- 461 18 McCallum, M. *et al.* SARS-CoV-2 immune evasion by the B.1.427/B.1.429  
462 variant of concern. *Science*, doi:10.1126/science.abi7994 (2021).
- 463 19 Wang, P. *et al.* Increased resistance of SARS-CoV-2 variant P.1 to antibody  
464 neutralization. *Cell Host Microbe* **29**, 747-751 e744,  
465 doi:10.1016/j.chom.2021.04.007 (2021).
- 466 20 Lucas, C. *et al.* Impact of circulating SARS-CoV-2 variants on mRNA  
467 vaccine-induced immunity. *Nature*, doi:10.1038/s41586-021-04085-y

- 468 (2021).
- 469 21 Liu, H. *et al.* The Lambda variant of SARS-CoV-2 has a better chance than  
470 the Delta variant to escape vaccines. *bioRxiv*,  
471 doi:10.1101/2021.08.25.457692 (2021).
- 472 22 Wang, P. *et al.* Antibody Resistance of SARS-CoV-2 Variants B.1.351 and  
473 B.1.1.7. *Nature*, doi:10.1038/s41586-021-03398-2 (2021).
- 474 23 Tortorici, M. A. *et al.* Broad sarbecovirus neutralization by a human  
475 monoclonal antibody. *Nature* **597**, 103-108, doi:10.1038/s41586-021-  
476 03817-4 (2021).
- 477 24 Starr, T. N. *et al.* SARS-CoV-2 RBD antibodies that maximize breadth and  
478 resistance to escape. *Nature* **597**, 97-102, doi:10.1038/s41586-021-  
479 03807-6 (2021).
- 480 25 Jette, C. A. *et al.* Broad cross-reactivity across sarbecoviruses exhibited by  
481 a subset of COVID-19 donor-derived neutralizing antibodies. *Cell Rep* **36**,  
482 109760, doi:10.1016/j.celrep.2021.109760 (2021).
- 483 26 Barros-Martins, J. *et al.* Immune responses against SARS-CoV-2 variants  
484 after heterologous and homologous ChAdOx1 nCoV-19/BNT162b2  
485 vaccination. *Nat Med* **27**, 1525-1529, doi:10.1038/s41591-021-01449-9  
486 (2021).
- 487 27 Turner, J. S. *et al.* SARS-CoV-2 infection induces long-lived bone marrow  
488 plasma cells in humans. *Nature* **595**, 421-425, doi:10.1038/s41586-021-  
489 03647-4 (2021).
- 490 28 Sokal, A. *et al.* mRNA vaccination of naive and COVID-19-recovered  
491 individuals elicits potent memory B cells that recognize SARS-CoV-2  
492 variants. *Immunity*, doi:10.1016/j.immuni.2021.09.011 (2021).
- 493



**A**

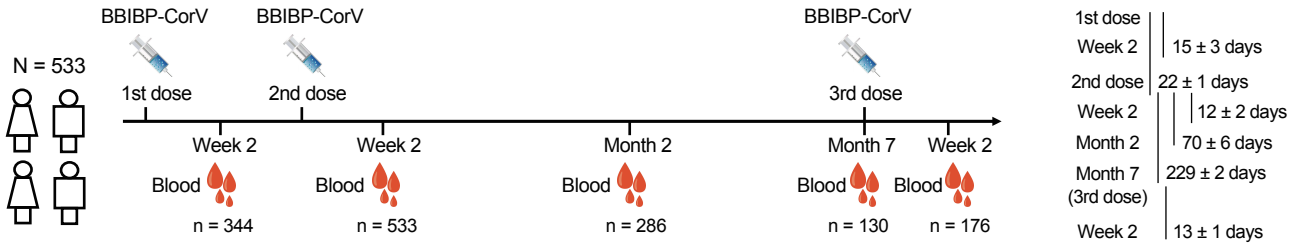

**B**

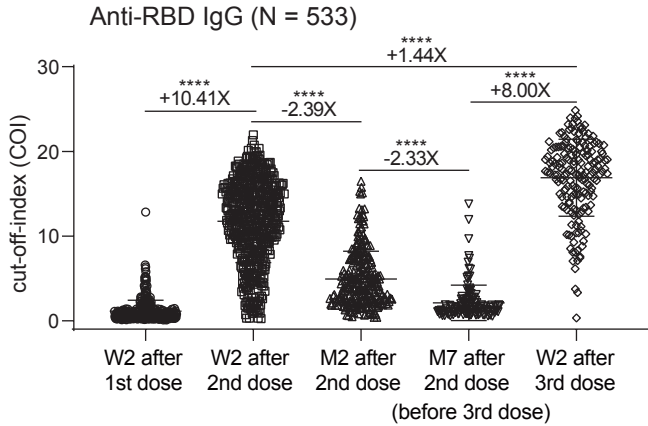

**C**

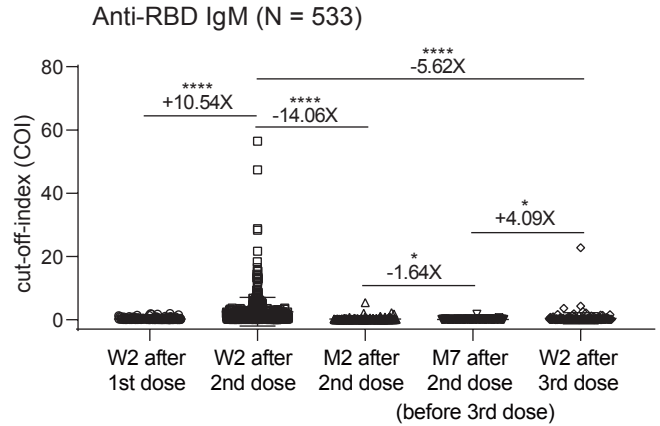

**D**

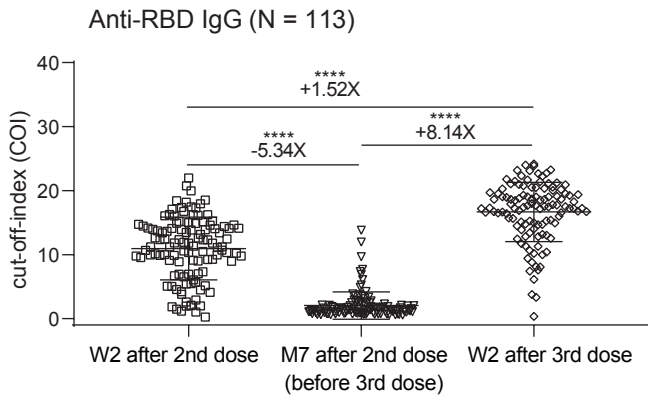

**E**

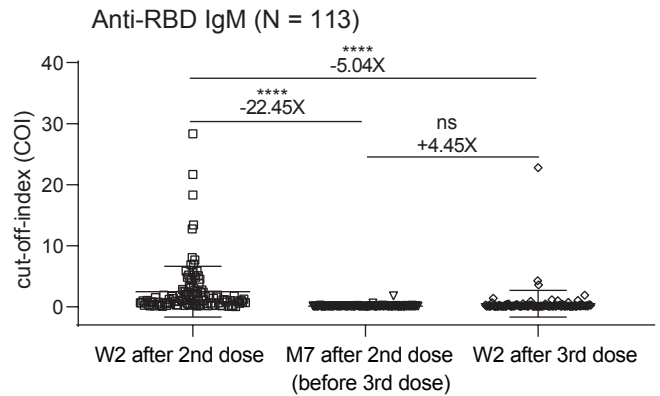

**F**

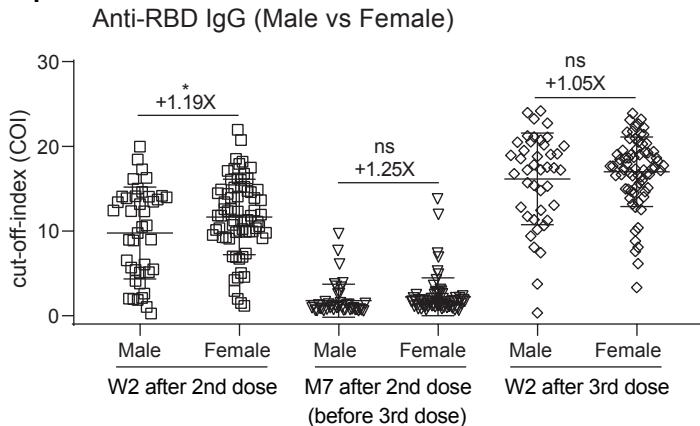

**G**

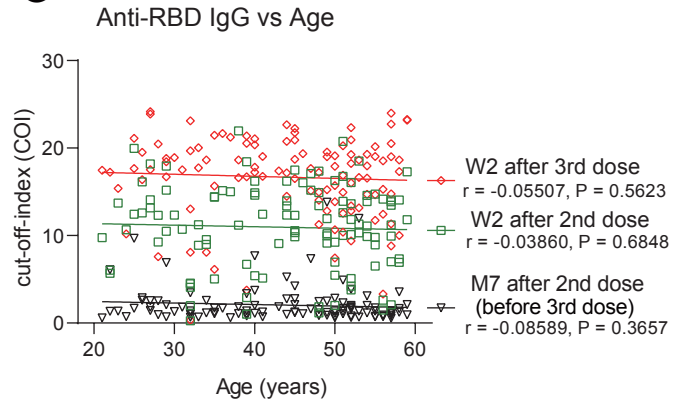

**Figure 2**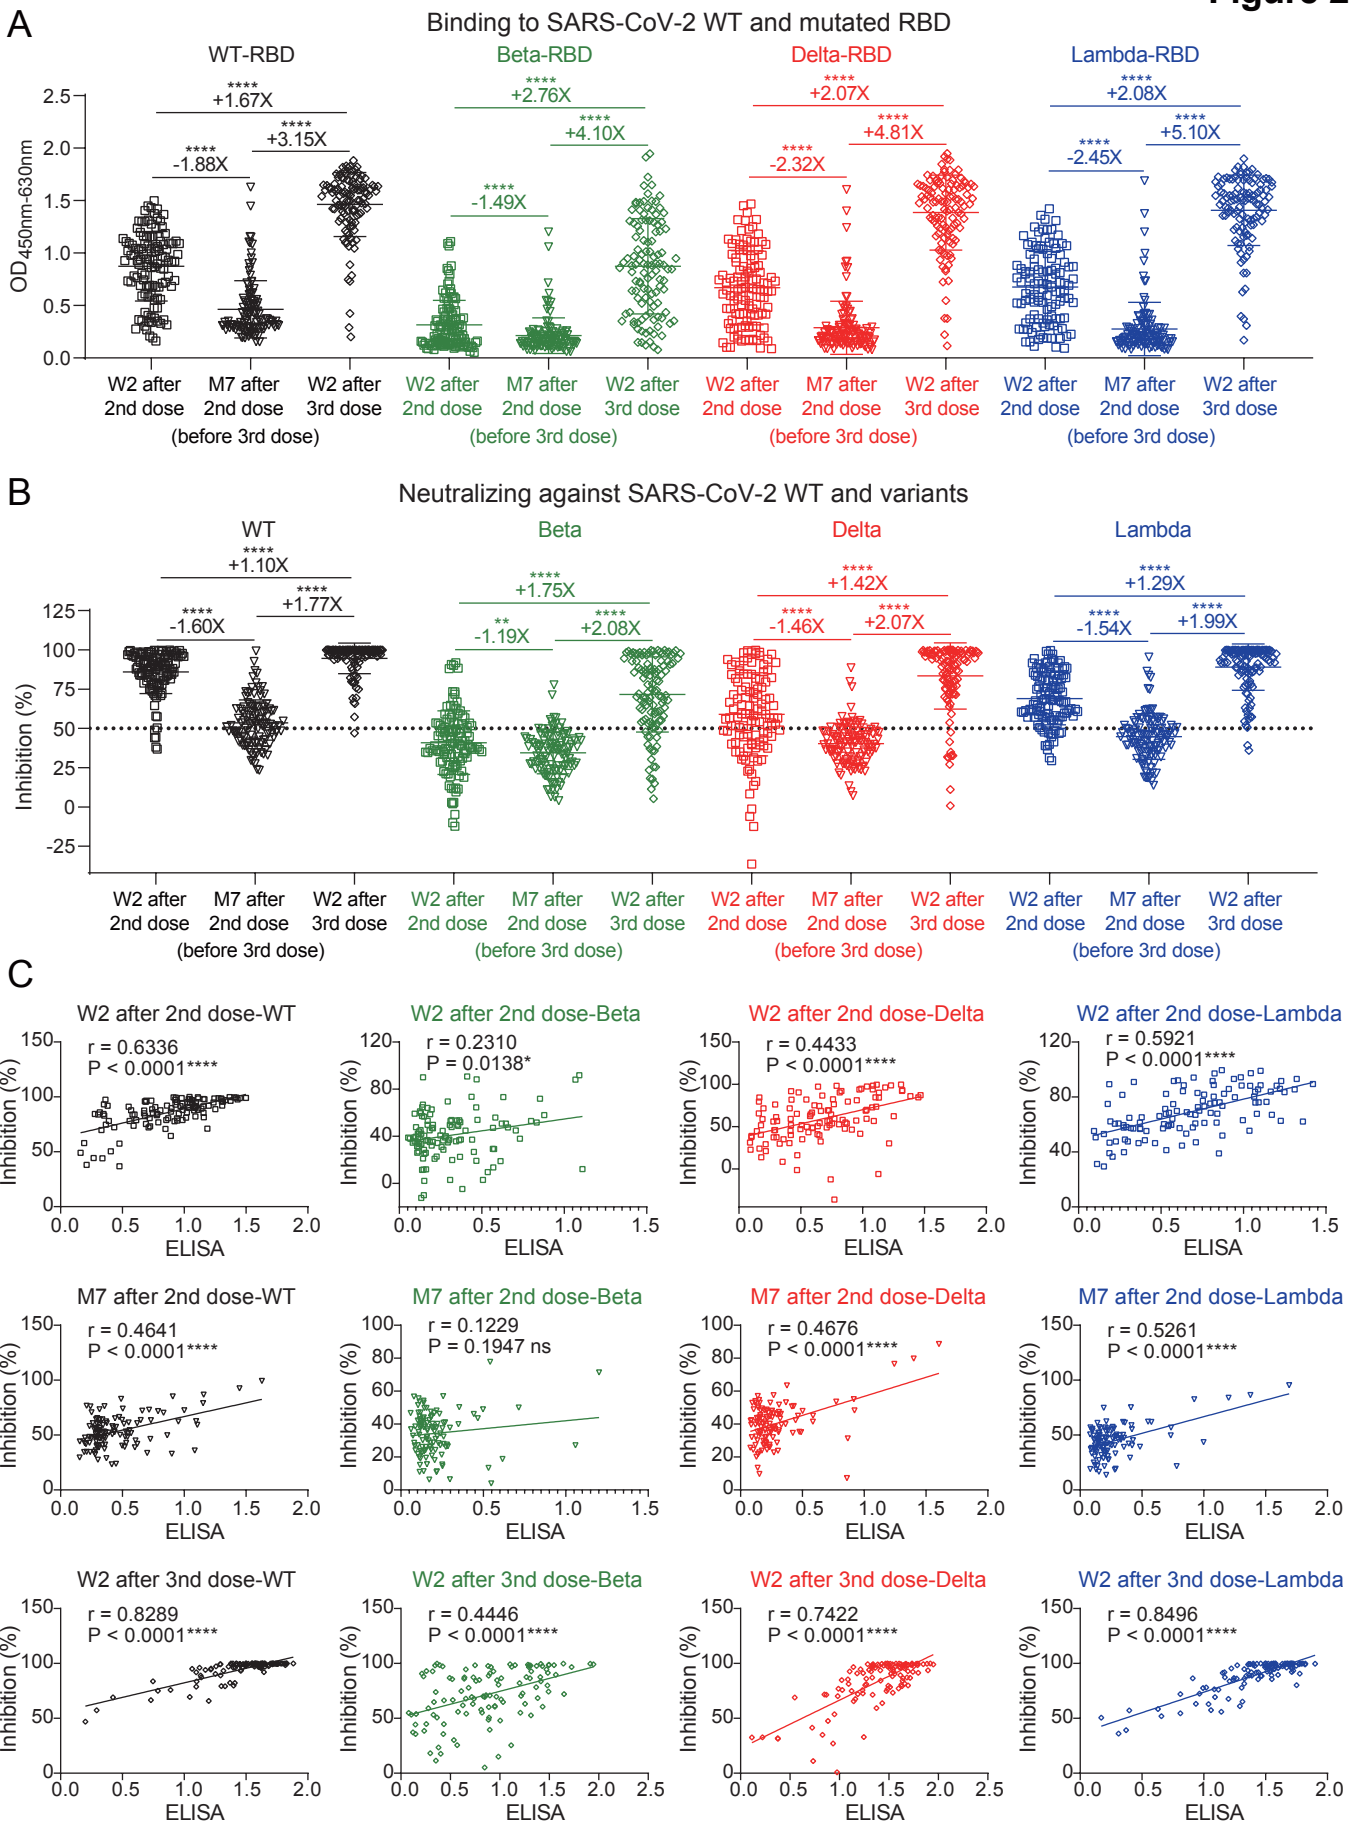

**Figure 3**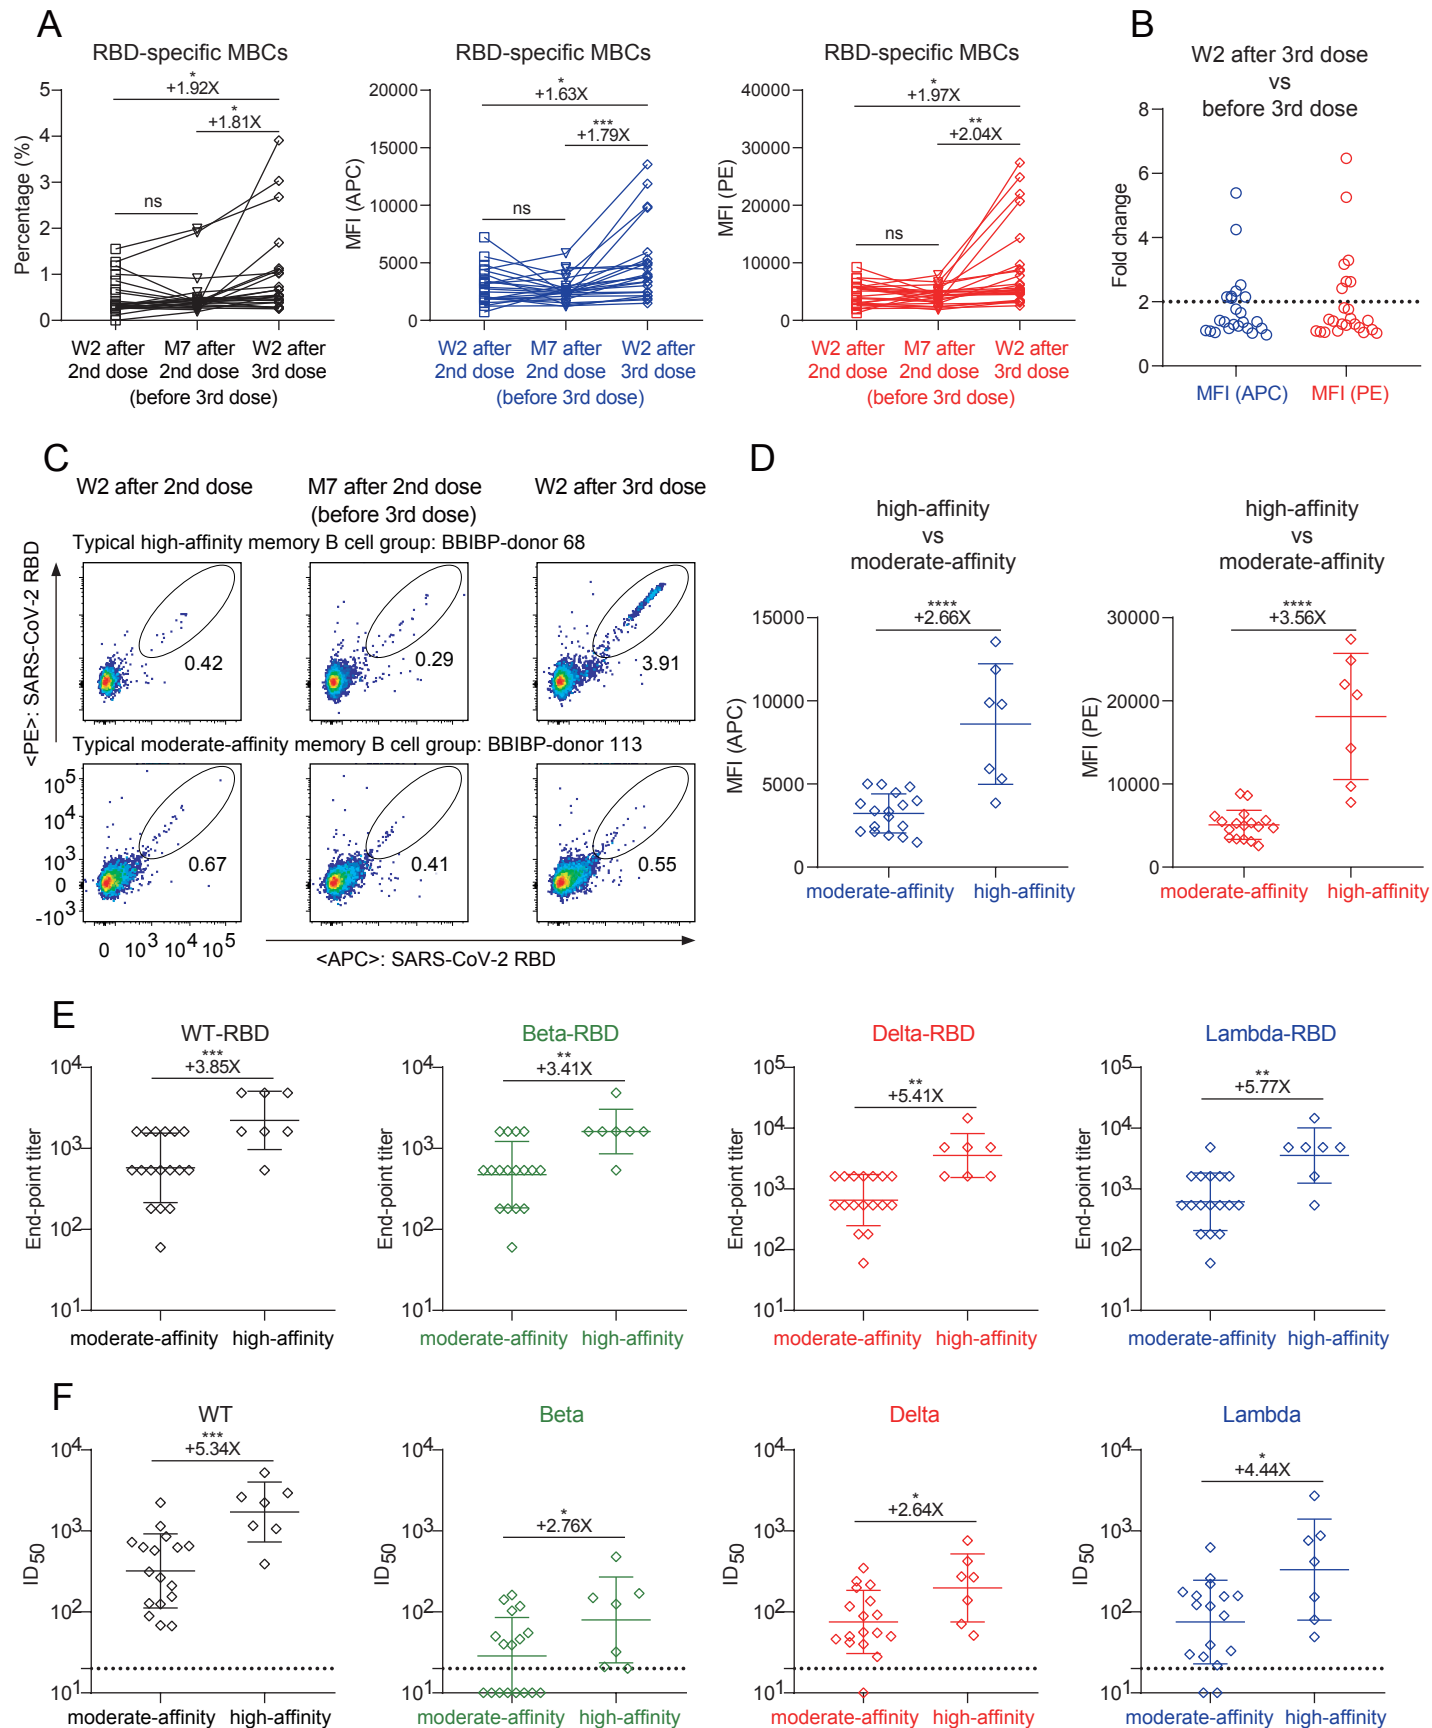

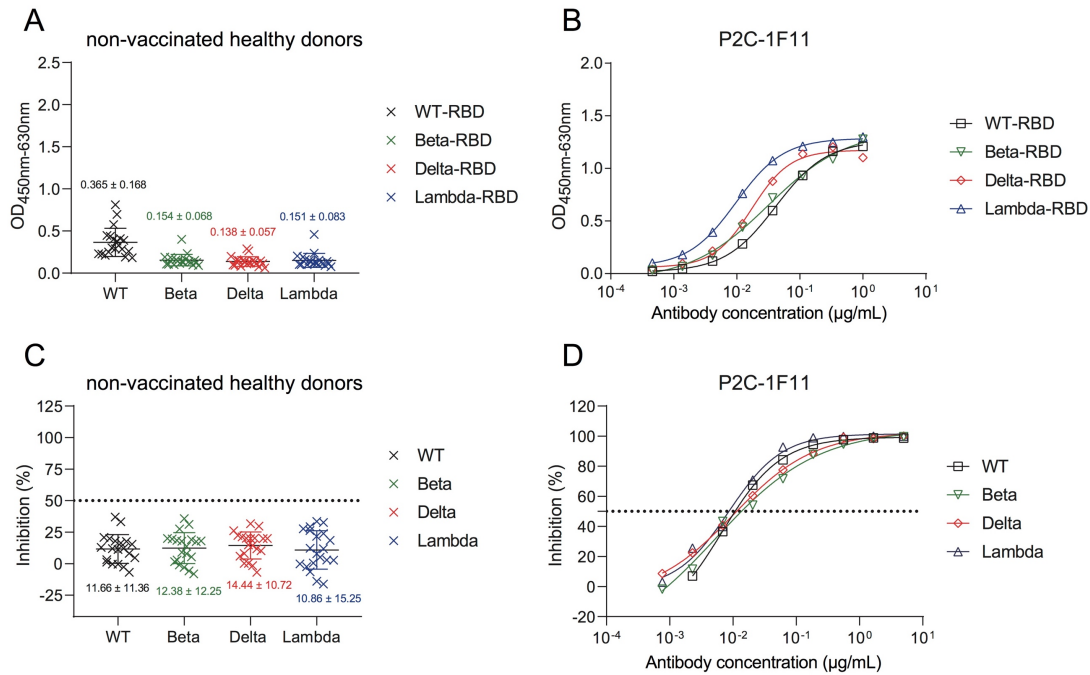

1

2 **Figure S1. ELISA and neutralization profiles of non-vaccinated healthy**  
3 **donor plasma and a positive control mAb.**

4 ELISA binding of 20 non-vaccinated healthy donor plasma samples collected  
5 prior to COVID-19 pandemic **(A)** and a positive control mAb **(B)** to SARS-CoV-  
6 2 WT, Beta, Delta, and Lambda RBD proteins. Neutralizing activities of 20 non-  
7 vaccinated healthy donor plasma samples collected prior to COVID-19  
8 pandemic **(C)** and a positive control mAb **(D)** against SARS-CoV-2  
9 pseudoviruses of WT, Beta, Delta, and Lambda variants. Healthy donor plasma  
10 samples were tested at a dilution of 1:20. A positive control mAb (P2C-1F11)  
11 was serially 3-fold diluted from 1 µg/mL in ELISA and 5 µg/mL in neutralizing  
12 assay. All experiments were performed in duplicate and the mean ± SD values  
13 were shown.

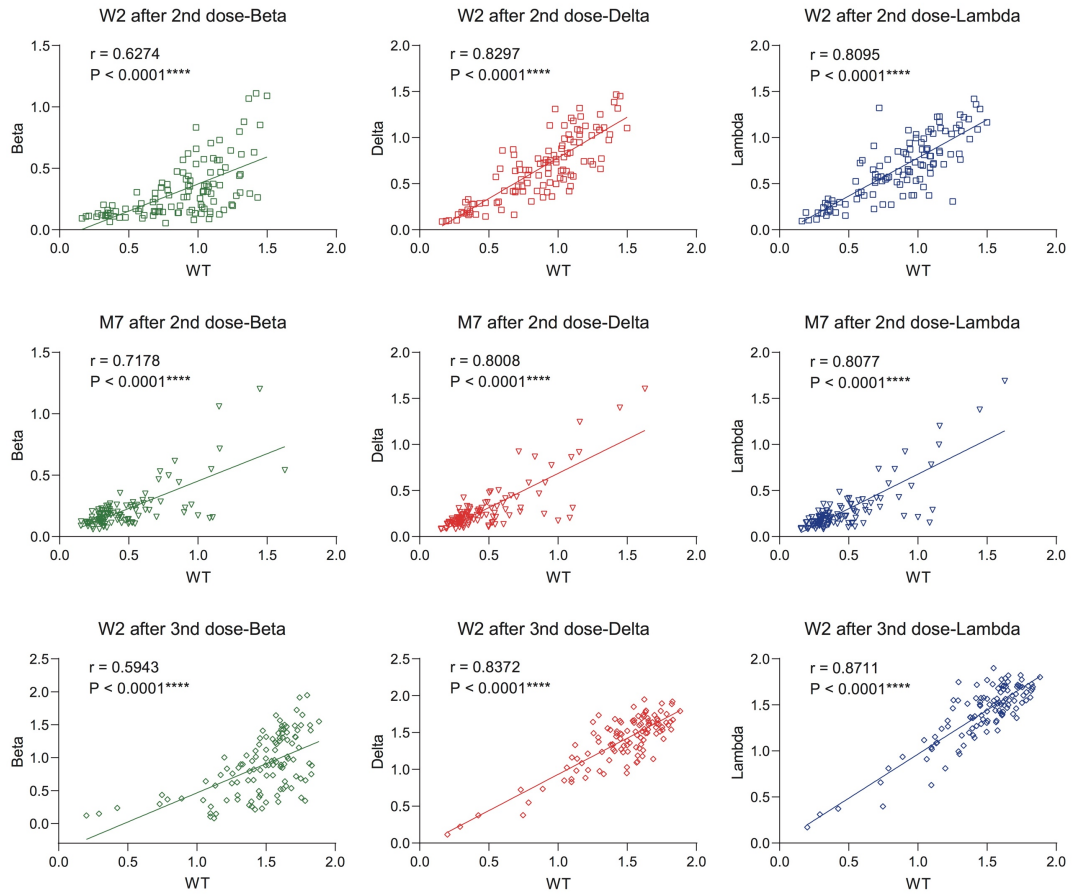

14

15 **Figure S2. Correlation analysis between binding activities to SARS-CoV-**  
16 **2 WT and mutated (Beta, Delta, and Lambda) RBD proteins of 113 identical**  
17 **participants at three follow-up visits.**

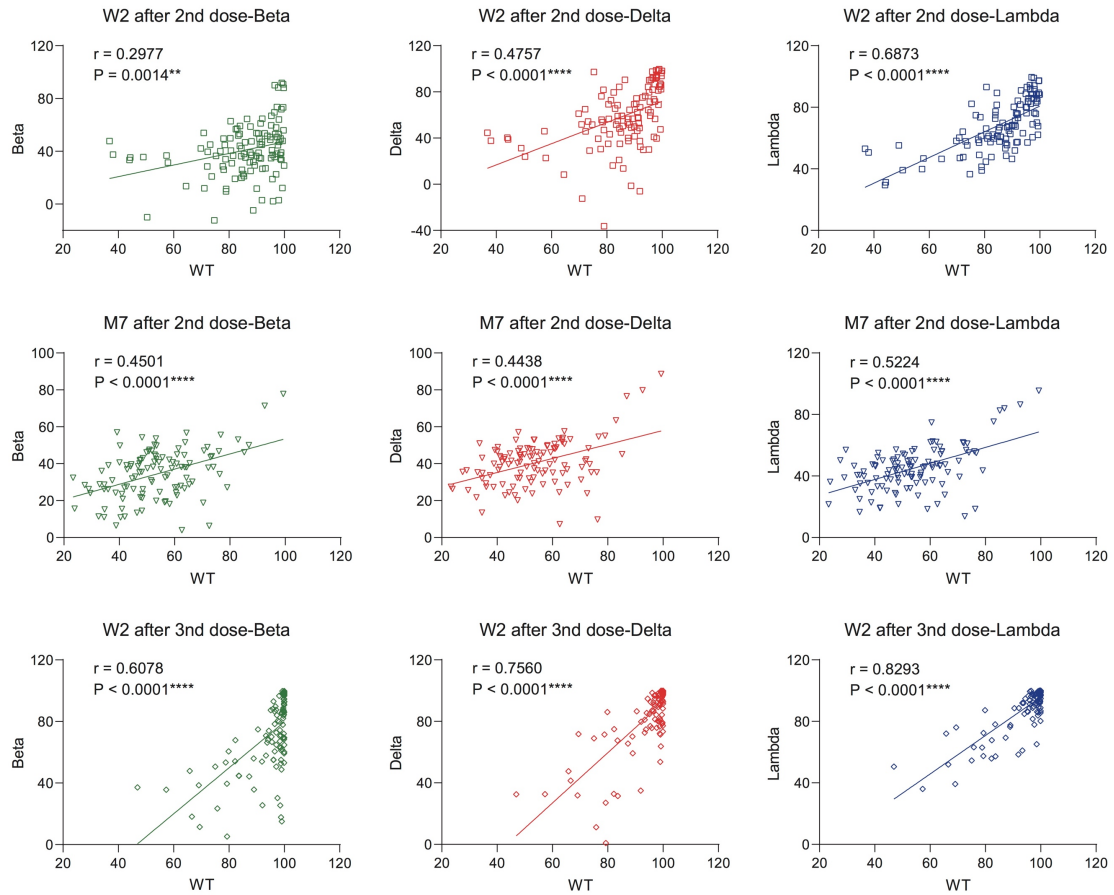

18

19 **Figure S3. Correlation analysis between neutralizing activities against**  
20 **SARS-CoV-2 WT and variants (Beta, Delta, and Lambda) of 113 identical**  
21 **participants at three follow-up visits.**

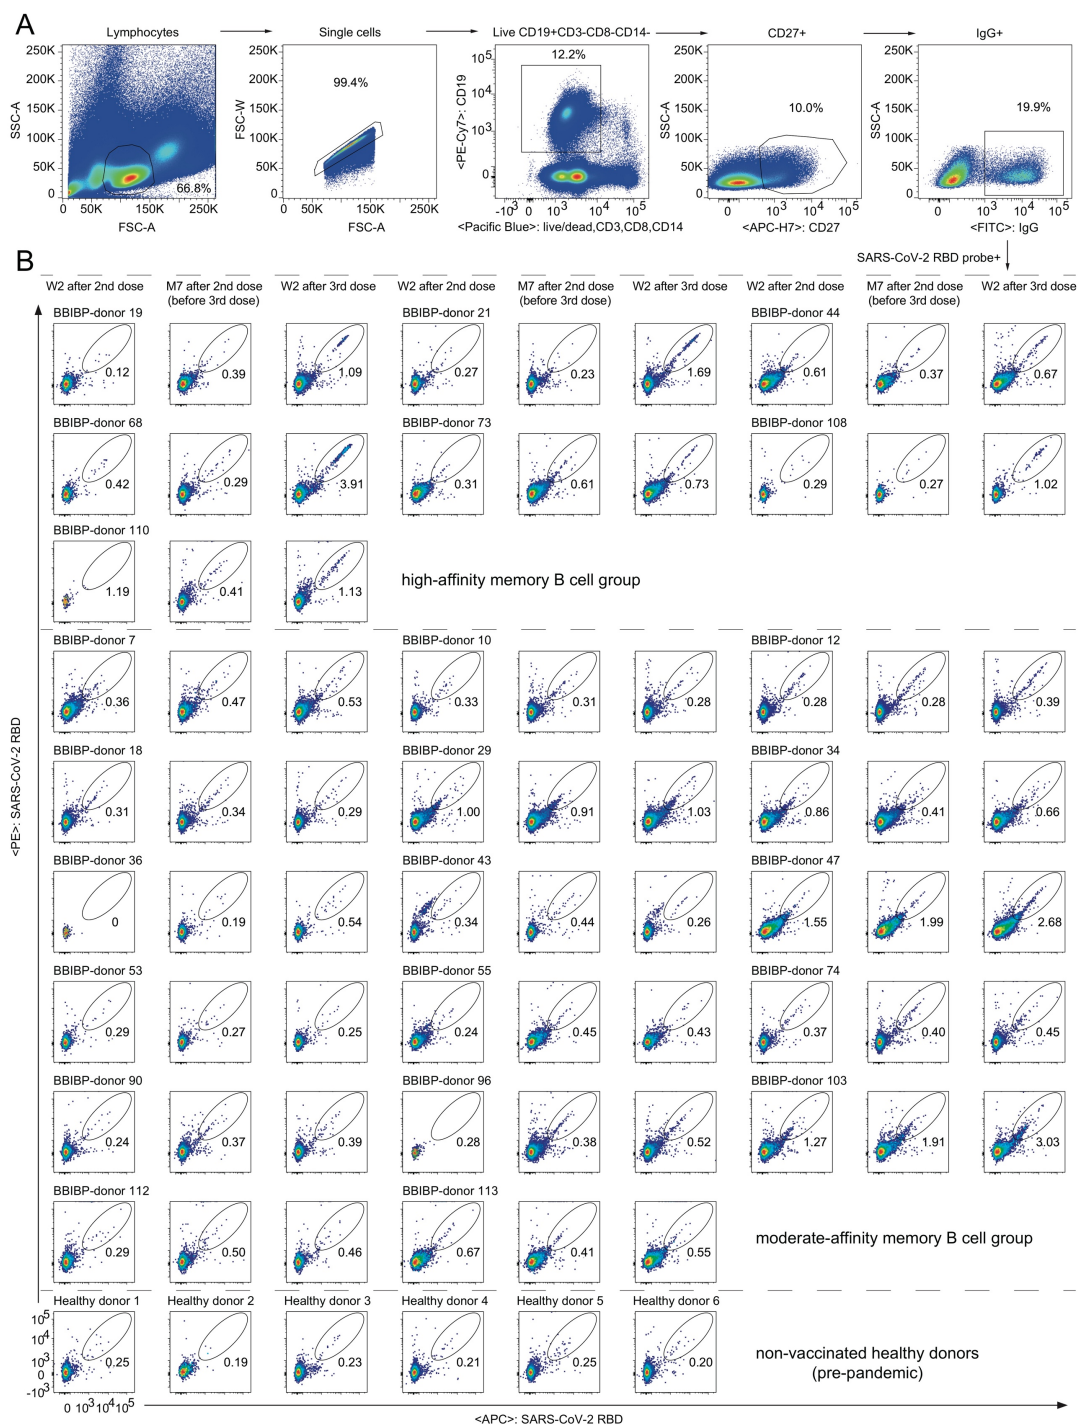

22

23 **Figure S4. The gating strategy for identification of SARS-CoV-2 WT RBD-**  
 24 **specific memory B cells by FACS.**

25 **(A)** Single B cells were gated as CD19<sup>+</sup>CD3<sup>-</sup>CD8<sup>-</sup>CD14<sup>-</sup>CD27<sup>+</sup>IgG<sup>+</sup>. **(B)** Flow  
 26 cytometry showing the percentage of double-positive (APC<sup>+</sup>PE<sup>+</sup>) RBD-binding  
 27 memory B cells of randomly selected 24 identical participants at three follow-  
 28 up visits and 6 non-vaccinated healthy donors.

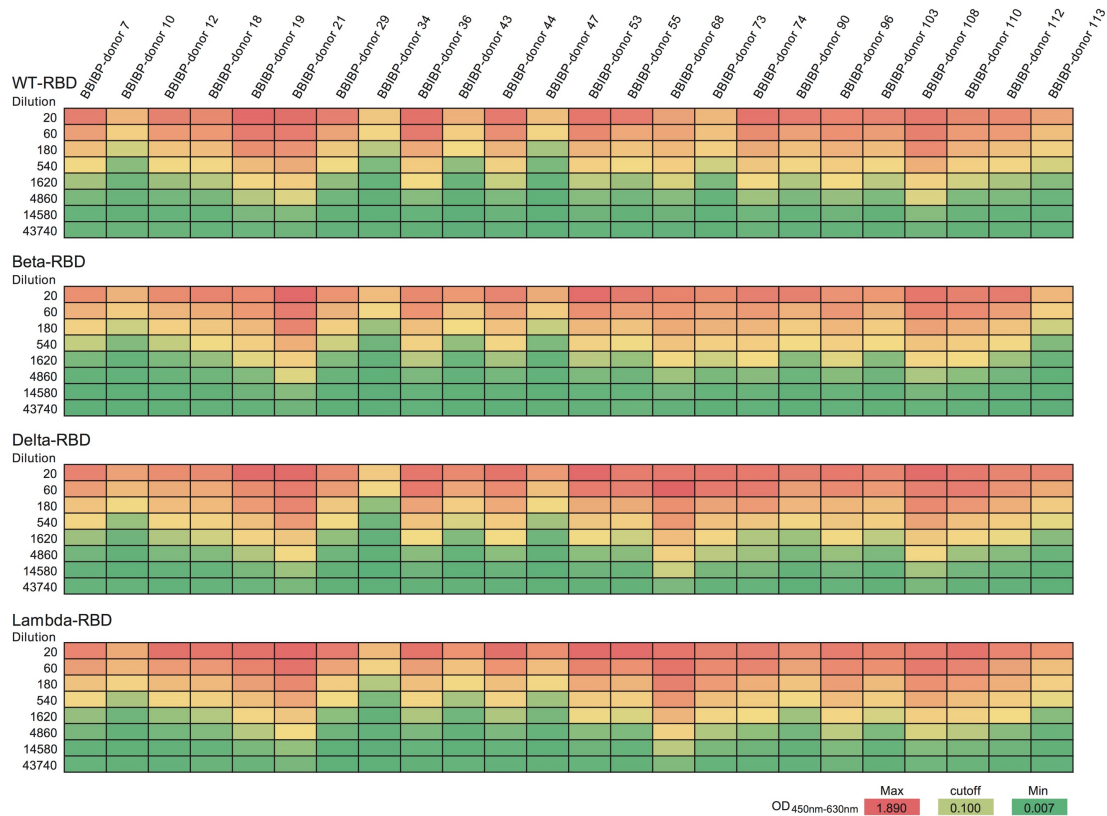

29

30 **Figure S5. ELISA binding of 24 vaccinee plasma samples at Week 2 after**  
31 **third vaccination to SARS-CoV-2 WT and mutated (Beta, Delta, and**  
32 **Lambda) RBD proteins.**

33 All plasma samples were serially 3-fold diluted from 1:20. The assay was  
34 performed in duplicate and the mean value in each dilution was shown. The  
35 cut-off value was set as an OD<sub>450nm-630nm</sub> value of 0.100 and the end-point titer  
36 was defined as the last dilution whose OD<sub>450nm-630nm</sub> value was more than 0.100.

37



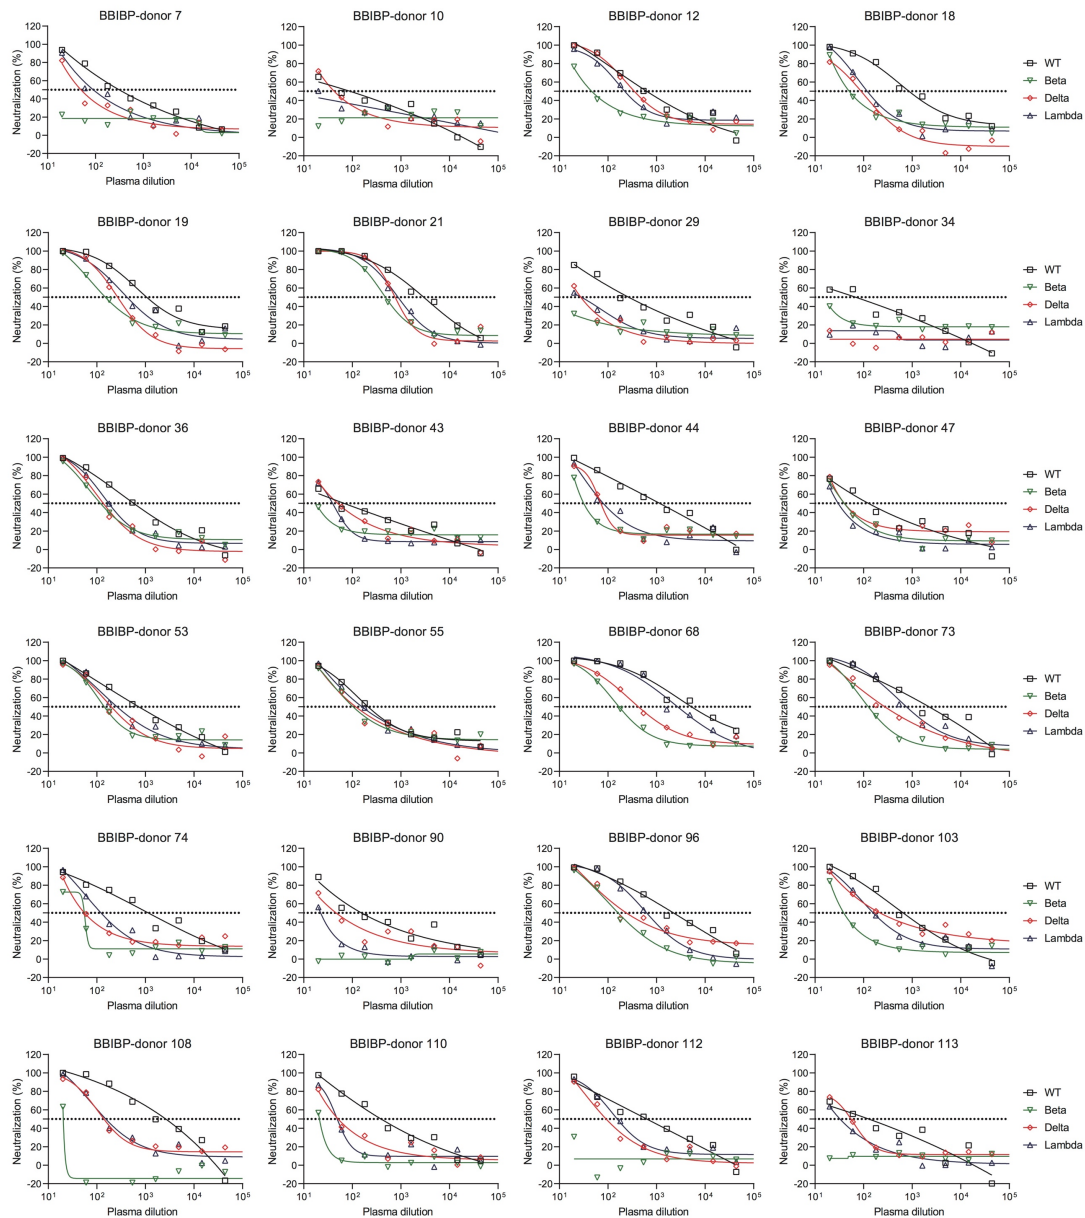

38

39 **Figure S6. Neutralization curves of 24 vaccinee plasma samples at Week**  
40 **2 after third vaccination against SARS-CoV-2 pseudoviruses of WT and**  
41 **variants (Beta, Delta, and Lambda).**

42 All plasma samples were serially 3-fold diluted from 1:20. The assay was  
43 performed in duplicate and the mean inhibition in each dilution was shown. A  
44 50% reduction in viral infectivity was indicated by a horizontal dashed line.
